# Supplementary material for: TGF-β contamination of purified recombinant GDF15
Source: PubMed Central journal article supplement (PMC5697882; doi:10.1371/journal.pone.0187349), 2017-11-21
Supplement: pone.0187349.s004.pdf [file pone.0187349.s004.pdf]

## S1 File

### Supporting materials and methods

#### Transfection of human mesenchymal stem cells

Mesenchymal stem cells (MSC) (Lonza, Walkersville, MD, USA) were cultured in mesenchymal stem cell growth media (Lonza) at 37 °C in a humidified atmosphere containing 5 % CO<sub>2</sub>, according to the manufacturer's instructions. Cells were plated 24 hours before they were transfected with ON-TARGETplus Non-Targeting pool, SMARTpool *ACVR1B*, or *TGFBR1* siRNAs (Dharmacon RNAi technologies by Thermo Scientific, Lafayette, CO, USA) using Lipofectamine RNAiMAX. Two days after transfection the cells were used for experiments.

#### QRT-PCR

The QRT-PCR for receptor expression in cells was performed as described in the main manuscript. The additional QRT-PCR Taqman assays used in S3 Fig were: *TGFBR2* (Hs00234253\_m1), *TGFBR3* (betaglycan) (Hs01114253\_m1), and *ENG* (endoglin) (Hs00923997\_g1).
